# Supplementary material for: A rational design of NixCoyP@C cocatalyst for enhanced overall water splitting based on g-C3N4photocatalyst — the synergy of carbon-shell modification and bimetal modulation
Source: Royal Society of Chemistry journal article supplement (doi:10.1039/d1cy01666k), 2021-12-24
Supplement: d1cy01666k1.pdf [file d1cy01666k1.pdf]

## Supporting information

### Rational design of $\text{Ni}_x\text{Co}_{1-x}\text{P}@C$ cocatalyst for enhanced overall water splitting based on g- $\text{C}_3\text{N}_4$ photocatalyst — the synergy of carbon-shell modification and bimetal modulation

Tingfeng Zhang#, Xuefang Lan#, Lili Wang, Jinsheng shi, kefeng Xiao\*

Qingdao Agricultural University, Department of Chemistry and Pharmacy, China

\* Corresponding author at: Qingdao Agricultural University, Department of Chemistry and Pharmacy, Chengyang District, Qingdao, China

E-mail address: jsshqn@aliyun.com

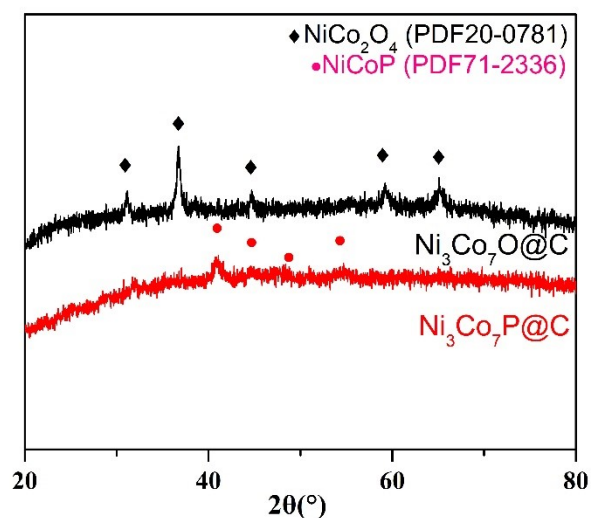

Fig. S1 XRD patterns of  $\text{Ni}_3\text{Co}_7@C$  after oxidation and phosphidation

Table S1 ICP results of co-catalyst and catalyst

| Samples                                | Co(wt%) | Ni(wt%) | NDCS  | P(wt%) | S(wt%) | Co/Ni |
|----------------------------------------|---------|---------|-------|--------|--------|-------|
| 5%Ni <sub>3</sub> Co <sub>7</sub> P/CN | 1.06    | 0.48%   | --    | 1.57   | 0.071  | 2.2   |
| Ni <sub>7</sub> Co <sub>3</sub>        | 20.55   | 42.81%  | 36.64 | --     | --     | 0.48  |
| Ni <sub>5</sub> Co <sub>5</sub>        | 35.91   | 32.65%  | 31.44 | --     | --     | 1.1   |
| Ni <sub>3</sub> Co <sub>7</sub>        | 45.12   | 19.61%  | 35.27 | --     | --     | 2.3   |

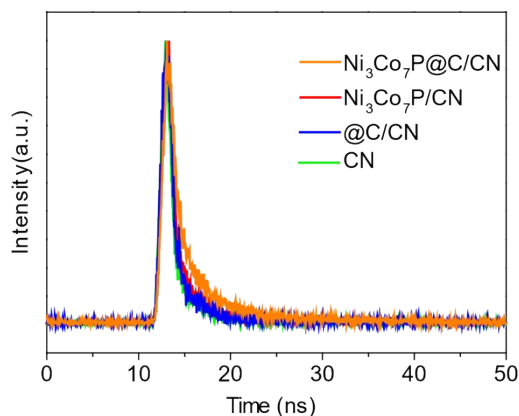

Fig. S2 Transient PL spectra of g-C<sub>3</sub>N<sub>4</sub>, @C/CN, Ni<sub>3</sub>Co<sub>7</sub>-P/CN and Ni<sub>3</sub>Co<sub>7</sub>-P@C/CN  
The transient PL spectra show increasing fluorescent lifetime in the order g-C<sub>3</sub>N<sub>4</sub> < @C/CN < Ni<sub>3</sub>Co<sub>7</sub>-P/CN < Ni<sub>3</sub>Co<sub>7</sub>-P@C/CN, indicating the increasing carrier separation and transfer efficiency in the same order., which is consistent with the steady-state PL results.
